# Supplementary material for: Application of Digital Holographic Imaging to Monitor Real-Time Cardiomyocyte Hypertrophy Dynamics in Response to Norepinephrine Stimulation
Source: MDPI journal article supplement (doi:10.3390/app14093819), 2024-04-30
Supplement: s1 [file s1]

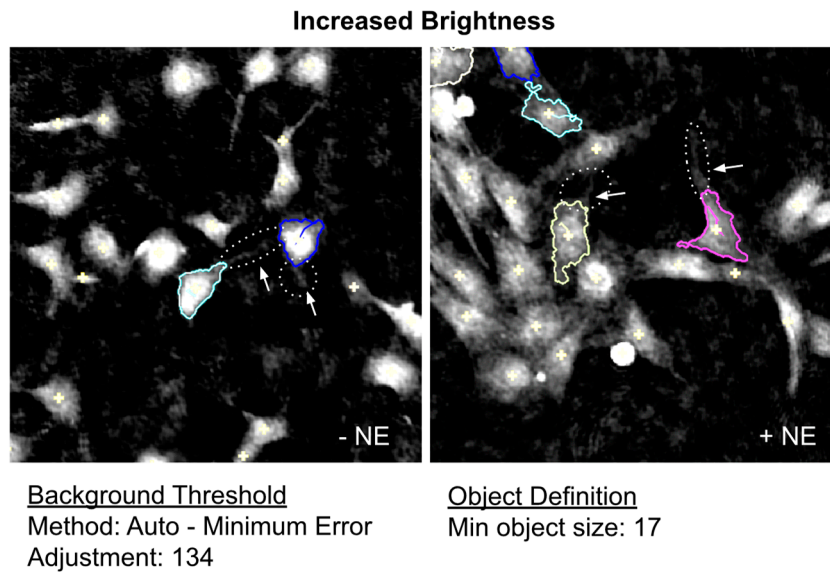

**Figure S1.** Limitations in image thresholding, segmentation, and parameter quantification of cultured cardiomyocytes using the HOLOMONITOR App Suite software. Brightness-enhanced panels of image segmentation and identification of untreated and NE-stimulated cardiomyocytes (CMs) using the HOLOMONITOR App Suite software and the Single Cell Tracking module. White arrowheads point to dashed circles outlining cellular processes that could not be discerned above the background during segmentation.
